# Supplementary material
Source: publisher figshare collection journal article supplement (https://scielo.figshare.com/articles/dataset/_/5666704)
Supplement: Supplementary file 1 [file Table_1.xls]

## Sheet: Table_1
<b>References</b>	<b>Ø (mm)</b>	<b>le (mm)</b>	<b>c (mm)</b>	<b>Age (days)</b>	<b>Concrete compressive strength f<sub>c</sub> (MPa)</b>
Castro (2000) [<a href="#B16">16</a>]	16	80	52 / 92	15 / 18	83,04 / 86,14
Fernandes (2000) [<a href="#B17">17</a>]	10 / 20	50 / 100	45 / 90	28	27,47 / 27,99
Barbosa (2002) [<a href="#B18">18</a>]	16 / 20	80 / 100	52 / 90	90	33,63/54,77/63,31/
França (2004) [<a href="#B19">19</a>]	16	80	92	28 / 90	32,97 / 35,21
Almeida Filho (2006) [<a href="#B20">20</a>]	10 / 16	50 / 80	45 / 72	7 / 14	30 / 60
Graeff (2007) [<a href="#B21">21</a>]	8/12,5	40/62,5	36/56,2	21	25
Caetano (2008) [<a href="#B15">15</a>]	12,5	62,5	61,8	63	25 / 45 / 65
Simplício (2008)[<a href="#B22">22</a>]	6,3/8/10/ 12,5/16	18,9/24/30/ 37,5/48	96,9/96/95/ 93,8/92	90	40/35,9/41,4/34/37,4/39,4 /40/39,6/28/29,1/29,3
Reis (2009)[<a href="#B23">23</a>]	10/16	50/80	45/72	28	23,6/ 37,2
Silva (2010) [<a href="#B3">3</a>]; Silva et al. (2013) [<a href="#B24">24</a>]	8/10 /12,5	40/50/62,5	96/95/93,7	3/7/28	16,7/21,1/28/33,1/40,5/49,9
Lorrain et al. (2010) [<a href="#B25">25</a>]	12,5	62,5	56,2	28	20
Lorrain et al. (2011) [<a href="#B4">4</a>]	8	80/135	36	3/7/14	6,8/8,1/15,07/23,54/26,75/ 27,12
Ferreira et al. (2011)[<a href="#B26">26</a>]	6,3/8/10	31,5/40/50	46	7	38,2/45,3
Tojal (2011)[<a href="#B27">27</a>]	10/16	50/ 80	45/ 72	28	34,5
Silva Filho et al. (2012) [<a href="#B28">28</a>]	12,5	62,5	56,2	28	27,4
França (2012)[<a href="#B29">29</a>]	6,3/8/10	31,5/40/50	96,9/96/95	21	25/40
Baiochi et al. (2013) [<a href="#B30">30</a>] Jacintho et al. (2013)[<a href="#B31">31</a>]	10	63	46	7/28	49,56/59,63
Godoy et al. 2012)[<a href="#B32">32</a>] Jacintho et al. (2014)[<a href="#B33">33</a>]	8	110	46	14/ 28	23,54/38,27/43,27
Lovera e Frutos (2013)[<a href="#B34">34</a>] Gavilan et al. (2014)[<a href="#B35">35</a>]	8	91/80/70/63	46	3/5/7/28	20/25/30/35
Silva (2010) [<a href="#B3">3</a>]; Silva et al. (2014)[<a href="#B36">36</a>]	8/10/12,5	80/100/125/ 48/60/45	46/45/43,75	3/7/28	16,7/21,1/28/33,1/40,5/49,9
Martins et al. (2014)[<a href="#B37">37</a>]	8	95/47/39,6	45	7	23,15/45,40/50,61
